# Supplementary material for: VERA: agent-based modeling transmission of antibiotic resistance between human pathogens and gut microbiota
Source: Oxford University Press journal article supplement (doi:10.1093/bioinformatics/btz154), 2019-02-27
Supplement: bioinformatics_35_19_3803_s5.zip [file bioinformatics_35_19_3803_s5.zip]

## Supplementary Tables

# VERA: agent-based modeling transmission of antibiotic resistance between human pathogens and gut microbiota

This supplement contains:  
Supplementary Tables 1– 7, References

| Table | Title                                                                        |
|-------|------------------------------------------------------------------------------|
| 1     | Probabilities values used to build the model for <i>Shigella</i> sp.         |
| 2     | Characteristic of agent states.                                              |
| 3     | Input parameters values for <i>Shigella</i> sp.                              |
| 4     | Parameter symbols and values used to build the model for <i>Shigella</i> sp. |
| 5     | Rangers for input parameters.                                                |
| 6     | Grid of parameters.                                                          |
| 7     | Parameter values for the ESKAPE pathogens.                                   |

**Supplementary Table 1 | Probabilities values used to build the model for *Shigella* sp.**  
Considering of the model probabilities values whereby agents pass between states.

| Probability | Description                                                        | Value                                                                                     |
|-------------|--------------------------------------------------------------------|-------------------------------------------------------------------------------------------|
| $p_1$       | to be hospitalized with other problems, non pathogen               | 0.002                                                                                     |
| $p_2$       | to be infected (column "pGetInfectedTown" in the result table)     | $p_2 = i_c * \frac{\mu_3 + \mu_4 + 0.5 * (\mu_6 + \mu_7)}{townHealthy + numInfectedTown}$ |
| $p_3$       | to be hospitalized with pathogen from incubation period            | 0.07                                                                                      |
| $p_4$       | to be hospitalized with AB sensitive pathogen from home treatment  | $p_3$                                                                                     |
| $p_5$       | to be hospitalized with AB resistance pathogen from home treatment | $p_3 * r_c * 10$                                                                          |
| $p_6$       | to be infected in hospital                                         | 0.06                                                                                      |
| $p_7$       | to become resistant pathogen                                       | $r_i * r_c$                                                                               |
| $p_8$       | to get incorrect home treatment period                             | 0.21                                                                                      |
| $p_9$       | to be infected in hospital with resistant pathogen                 | $r_h$                                                                                     |

**Supplementary Table 2 | Characteristic of agent states.** Agent states were characterized by: location, presence of the pathogen, resistance occurrence of pathogen, level of microbiota resistance, possible transits, treatment period, incubation period, group of antibiotic.

| Name of state                          | Characteristics                                                                                                                                                                                                                                                                                                                                                                                                  |
|----------------------------------------|------------------------------------------------------------------------------------------------------------------------------------------------------------------------------------------------------------------------------------------------------------------------------------------------------------------------------------------------------------------------------------------------------------------|
| <i>Healthy person</i>                  | location: town<br>infection: no<br>pathogen resistance: no<br>microbiota resistance: reduce on $r_-$ until $r_l$<br>possible transits: into <i>Non Infected person in hospital</i> with $p_1$ ,<br>into <i>Person in incubation period</i> with $p_2$<br>number of agents: $\mu_1$                                                                                                                               |
| <i>Non Infected person in hospital</i> | location: hospital<br>infection: no<br>pathogen resistance: no<br>microbiota resistance: reduce on $r_-$ until $r_l$<br>treatment period: $i_p$<br>possible transits: into <i>Healthy person</i> , into <i>Person in incubation period</i> with $p_6$ or $p_9$<br>number of agents: $\mu_2$                                                                                                                      |
| <i>Person in incubation period</i>     | location: town<br>infection: yes<br>pathogen resistance: can become resistant with the $p_7$<br>microbiota resistance: reduce on $r_-$ until $r_l$<br>incubation period: $i_p$<br>possible transits: into <i>Infected person in hospital</i> with $p_3$ , into <i>Person in AB incorrect treatment period</i> with $p_8$ , into <i>Person in AB treatment period</i> with $1 - p_8$<br>number of agents: $\mu_3$ |
| <i>Person in incubation period 2</i>   | location: town<br>infection: yes<br>pathogen resistance: yes<br>microbiota resistance: reduce on $r_-$ until $r_l$<br>possible transits: into <i>Infected person in hospital</i><br>number of agents: $\mu_4$                                                                                                                                                                                                    |
| <i>Infected person in hospital</i>     | location: hospital<br>infection: yes<br>therapy: Antibiotic-2<br>pathogen resistance: no<br>microbiota resistance: reduce on $r_-$ until $r_l$                                                                                                                                                                                                                                                                   |

|                                                |                                                                                                                                                                                                                                                                                                                                                                                                                                              |
|------------------------------------------------|----------------------------------------------------------------------------------------------------------------------------------------------------------------------------------------------------------------------------------------------------------------------------------------------------------------------------------------------------------------------------------------------------------------------------------------------|
|                                                | <p>treatment period: <math>i_p</math></p> <p>possible transits: into a state <i>Healthy person</i>.</p> <p>number of agents: <math>\mu_5</math></p>                                                                                                                                                                                                                                                                                          |
| <i>Person in AB incorrect treatment period</i> | <p>location: town</p> <p>infection: yes</p> <p>therapy: Antibiotic-1</p> <p>pathogen resistance: can become resistant with <math>p_7</math></p> <p>microbiota resistance: increase on <math>r_+</math></p> <p>possible transits: into <i>Person in incubation period 2</i>, into <i>Infected person in hospital</i> with the <math>p_4</math> or <math>p_5</math>.</p> <p>number of agents: <math>\mu_6</math></p>                           |
| <i>Person in AB treatment period</i>           | <p>location: town</p> <p>infection: yes</p> <p>therapy: Antibiotic-1</p> <p>pathogen resistance: can become resistant with the <math>p_7</math></p> <p>treatment period: <math>i_p</math></p> <p>microbiota resistance: increase on <math>r_+</math></p> <p>possible transits: into <i>Healthy person</i>, into <i>Infected person in hospital</i> with <math>p_4</math> or <math>p_5</math></p> <p>number of agents: <math>\mu_7</math></p> |

**Supplementary Table 3 | Input parameters values for *Shigella sp.*** Estimation of the input parameters values. Name of parameters in table correspond to names in config.properties file (see Material and Methods).

| Name of parameters            | Note    | Value              | Description                                                                                | Reference                     |
|-------------------------------|---------|--------------------|--------------------------------------------------------------------------------------------|-------------------------------|
| N_INCUB_LIMIT                 | $i_p$   | 4                  | Maximal incubation period of pathogen (days)                                               | Dekker and Frank (2015)       |
| C_INFECTED_COEF               | $i_c$   | 0.134              | Pathogen infection potential                                                               | Hypothesis                    |
| C_PATHOGEN_RESIST_CHANGE_COEF | $r_c$   | 0.61               | Pathogen susceptibility to receive antibiotic resistance                                   | Sack et al. (2001)            |
| P_INCUB_TO_HOSPITAL           | $p_3$   | 0.07               | Probability of being hospitalized during incubation period                                 | Asseray et al. (2013)         |
| P_WRONG_TREATMENT             | $p_8$   | 0.25               | Probability of incorrect antibiotic treatment                                              | Based on public opinion polls |
| P_BE_INFECTED_IN_HOSPITAL     | $p_6$   | 0.06               | Probability of being infected by pathogen during hospitalization without current infection | D'Agata et al. (2007)         |
| C_GROWTH_COEF                 | $r_+$   | 0.04               | Growth rate of antibiotic resistance                                                       | Wu et al. (2016)              |
| C_DECREASE_COEF               | $r_-$   | 0.025              | Decrease rate of antibiotic resistance                                                     | Hypothesis                    |
| P_HEALTHY_HOSPITALIZE         | $p_1$   | 0.002              | Probability of being hospitalized without current infection                                | Hypothesis                    |
| PERM_RESIST_LEVEL             | $r_l$   | $3.205 * 10^{-08}$ | Persistent level of gut antibiotic resistance                                              | Yarygin et al. (2017)         |
| N_PEOPLE_IN_TOWN              |         | 10000              | Agent count in all states                                                                  | Hypothesis                    |
| N_HOSP_ANT_TR_PERSON          | $\mu_5$ | 10                 | Agent count in State5 ( <i>Infected person in hospital</i> )                               | Hypothesis                    |

**Supplementary Table 4 | Parameter symbols and values used to build the model for *Shigella* sp.** Considering of the model parameters values. Characteristic names in table correspond to names in config.properties file (see Material and Methods). Data are derived from the literature, estimated during model running (see Table 3).

| Name of parameters            | Note      | Description                                                               | Value                                                                          |
|-------------------------------|-----------|---------------------------------------------------------------------------|--------------------------------------------------------------------------------|
| N_INFECTED_PEOPLE_PER_YEAR    | $\beta_i$ | Number of pathogen infected people per year based on public opinion polls | 19139                                                                          |
| N_PEOPLE_IN_COUNTRY           | $\beta_c$ | number of country population, mn                                          | 142.8                                                                          |
| C_INFECTED_COEF               | $i_c$     | coefficient of infection                                                  | $\frac{\beta_i * 10^3}{\beta_c * 10^6}$                                        |
| C_GROWTH_COEF                 | $r_+$     | coefficient of resistance growth                                          | 0.04                                                                           |
| C_DECREASE_COEF               | $r_-$     | coefficient of resistance decrease                                        | 0.025                                                                          |
| N_INCUB_LIMIT                 | $i_p$     | number of incubation period days                                          | 4                                                                              |
| C_PATHOGEN_RESIST_CHANGE_COEF | $r_c$     | Pathogen's capacity of receiving resistance change                        | 0.61                                                                           |
| PERM_RESIST_LEVEL             | $r_l$     | Persistent level of gut antibiotic resistance                             | $3.205 * 10^{-08}$                                                             |
|                               | $\mu_i$   | Agent count in $i$ -state                                                 | estimating in model running                                                    |
|                               | $r_i$     | Microbiota resistance level in $i$ -agent                                 | estimating in model running                                                    |
|                               | $r_t$     | Average pathogen resistance level in town                                 | estimating in model running                                                    |
|                               | $r_h$     | Average pathogen resistance level in hospital                             | estimating in model running                                                    |
|                               | $r_m$     | Average microbiota resistance level in town                               | from result table after model running with column name <i>AvMicResistTown</i>  |
|                               | $r_p$     | Average pathogen resistance level in town                                 | from result table after model running with column name <i>AvPathResistTown</i> |

**Supplementary Table 5 | Ranges for Input parameters.** This parameters values was used for multiple model launches to investigate indicators variation (see Material and Methods).

| Note  | Description                                                                                | Lower bound | Upper bound |
|-------|--------------------------------------------------------------------------------------------|-------------|-------------|
| $i_p$ | Maximal incubation period of pathogen (days)                                               | 1           | 14          |
| $i_c$ | Pathogen infection potential                                                               | 0.0001      | 1           |
| $r_c$ | Pathogen susceptibility to receive antibiotic resistance                                   | 0.0001      | 1           |
| $p_3$ | Probability of being hospitalized during incubation period                                 | 0.0001      | 1           |
| $p_8$ | Probability of incorrect antibiotic treatment                                              | 0.0001      | 1           |
| $p_6$ | Probability of being infected by pathogen during hospitalization without current infection | 0.0001      | 1           |
| $r_+$ | Growth rate of antibiotic resistance                                                       | 0.0001      | 1           |
| $r_-$ | Decrease rate of antibiotic resistance                                                     | 0.0001      | 1           |
| $p_1$ | Probability of being hospitalized without current infection                                | 0.0001      | 1           |
| $r_l$ | Persistent level of gut antibiotic resistance                                              | 0           | 1           |

**Supplementary Table 6 | Grid of parameters.** There are the input parameters, which was chosen by regression analysis as contributing to changes in indicator values. We name them *the control parameters*.

| Model indicator                            | Parameter                                                         | p-value        |
|--------------------------------------------|-------------------------------------------------------------------|----------------|
| The number of infected people              | Pathogen infection potential, $i_c$                               | 0              |
|                                            | Pathogen susceptibility to receive antibiotic resistance, $r_c$   | 0.008          |
|                                            | Maximal incubation period, $i_p$                                  | 0              |
|                                            | Probability of being hospitalized during incubation period, $p_3$ | 0              |
| The average level of microbiota resistance | Pathogen infection potential, $i_c$                               | 0              |
|                                            | Pathogen susceptibility to receive antibiotic resistance, $r_c$   | $2 * 10^{-15}$ |
|                                            | Probability of being hospitalized during incubation period, $p_3$ | 0              |
|                                            | Probability of incorrect antibiotic treatment, $p_8$              | $3 * 10^{-32}$ |
|                                            | Persistent level of gut antibiotic resistance, $r_l$              | 0              |
| The average level of pathogen resistance   | Pathogen infection potential, $i_c$                               | 0              |
|                                            | Pathogen susceptibility to receive antibiotic resistance, $r_c$   | $2 * 10^{-89}$ |
|                                            | Maximal incubation period, $i_p$                                  | $10^{-193}$    |
|                                            | Probability of being hospitalized during incubation period, $p_3$ | 0              |
|                                            | Persistent level of gut antibiotic resistance, $r_l$              | $4 * 10^{-81}$ |
| The probability of being infected          | Pathogen infection potential, $i_c$                               | 0              |
|                                            | Maximal incubation period, $i_p$                                  | 0              |
|                                            | Probability of being hospitalized during incubation period, $p_3$ | 0              |
|                                            | Probability of incorrect antibiotic treatment, $p_8$              | 0.01           |



**Supplementary Table 7 | Parameter values for the ESKAPE pathogens.** Values of pathogen susceptibility to receive antibiotic resistance  $r_c$ , which corresponds to C\_PATHOGEN\_RESIST\_CHANGE\_COEF in config.properties file (see Material and Methods). Data are derived from the literature for the ESKAPE pathogens (*Enterococcus faecium*, *Staphylococcus aureus*, *Klebsiella pneumoniae*, *Acinetobacter baumannii*, *Pseudomonas aeruginosa*, and *Enterobacter* species).

| Pathogen                       | Value | Reference                              |
|--------------------------------|-------|----------------------------------------|
| <i>Enterococcus faecium</i>    | 0.315 | Seo and Lee (2013)                     |
| <i>Staphylococcus aureus</i>   | 0.46  | Bishara et al. (2003)                  |
| <i>Klebsiella pneumoniae</i>   | 0.61  | Taitt et al. (2017)                    |
| <i>Acinetobacter baumannii</i> | 0.47  | Roy et al. (2010), Armin et al. (2015) |
| <i>Pseudomonas aeruginosa</i>  | 0.5   | Mulu et al. (2017)                     |
| <i>Enterobacter</i> sp.        | 0.183 | Knudsen et al. (2017)                  |

## REFERENCES

1. Wu, Guojun, et al. "Diminution of the gut resistome after a gut microbiota-targeted dietary intervention in obese children." *Scientific reports* 6 (2016)
2. D'Agata, Erika MC, et al. "Modeling antibiotic resistance in hospitals: the impact of minimizing treatment duration." *Journal of theoretical biology* 249.3 (2007): 487-499.
3. Asseray, Nathalie, et al. "Frequency and severity of adverse drug reactions due to self-medication: a cross-sectional multicentre survey in emergency departments." *Drug safety* 36.12 (2013): 1159-1168.
4. Sack, David A., et al. "Antimicrobial resistance in shigellosis, cholera and campylobacteriosis." (2001).
5. Yarygin K.S. et al. (2017) Resistomap—online visualization of human gut microbiota antibiotic resistome. *Bioinformatics* , 33, 2205–2206.
6. Dekker, John P., and Karen M. Frank. "Salmonella, Shigella, and yersinia." *Clinics in laboratory medicine* 35.2 (2015): 225-246.
7. Seo, Yumi, and Gilho Lee. "Antimicrobial resistance pattern in *Enterococcus faecalis* strains isolated from expressed prostatic secretions of patients with chronic bacterial prostatitis." *Korean journal of urology* 54.7 (2013): 477-481.
8. Bishara, Jihad, et al. "Co-trimoxazole-sensitive, methicillin-resistant *Staphylococcus aureus*, Israel, 1988–1997." *Emerging infectious diseases* 9.9 (2003): 1168.
9. Taitt, Chris Rowe, et al. "Antimicrobial resistance of *Klebsiella pneumoniae* stool isolates circulating in Kenya." *PloS one* 12.6 (2017): e0178880.
10. Roy, S., et al. "Gut colonization by multidrug-resistant and carbapenem-resistant *Acinetobacter baumannii* in neonates." *European journal of clinical microbiology & infectious diseases* 29.12 (2010): 1495-1500.
11. Armin, Shahnaz, et al. "Antimicrobial resistance patterns of *Acinetobacter baumannii*, *Pseudomonas aeruginosa* and *Staphylococcus aureus* isolated from patients with nosocomial infections admitted to tehran hospitals." *Archives of Pediatric Infectious Diseases* 3.4 (2015).
12. Mulu, Wondemagegn, et al. "Bacterial agents and antibiotic resistance profiles of infections from different sites that occurred among patients at Debre Markos Referral Hospital, Ethiopia: a cross-sectional study." *BMC research notes* 10.1 (2017): 254.
13. Knudsen, Per Kristian, et al. "Impact of extensive antibiotic treatment on faecal carriage of antibiotic-resistant enterobacteria in children in a low resistance prevalence setting." *PloS one* 12.11 (2017): e0187618.
